# Supplementary material for: Viral metagenomics revealed diverse CRESS-DNA virus genomes in faeces of forest musk deer
Source: Springer Nature journal article supplement (doi:10.1186/s12985-020-01332-y), 2020-04-25
Supplement: MOESM1 [file 17928658]

**supplementary table 1.** Primers of Screen PCR

| Species | UJSL004                | UJSL005                |
|---------|------------------------|------------------------|
| F1      | GATTGTATCGGGGCTAAGTCT  | TACTTAAACAGCCTGGTTACGA |
| R1      | CATCTTAGAAGCCAGGGGAAT  | AGGCTATCATTTTCATCGAGGT |
| F2      | GGGAGCCTAGTATTACCTTG   | CCATCCTCTGCCTATATGTGC  |
| R2      | AACGGCTATATTCATGTTTCGC | CGTTATTAGGTACAGGGGAGG  |

**supplementary table 2.** Primers of Inverse PCR

| Species | UJSL004               | UJSL005               |
|---------|-----------------------|-----------------------|
| F1      | TTTTATGGAGGAAAAGTCGCG | TTTGCCTCCTCTTGTCTGTG  |
| R1      | GTTCAACATTATAAGCGGGGG | GGACTGCACCTTCTTAGTAGT |
| F2      | AAATGCAGGTTTAGGACGAGT | CCTCCTCTAGCAACTAACGG  |
| R2      | ATCAGCAAAAGAAGTGGTAGG | TCCTTAAGAACTTCCCTCCG  |
