# Supplementary material for: Viral metagenomics revealed diverse CRESS-DNA virus genomes in faeces of forest musk deer
Source: Springer Nature journal article supplement (doi:10.1186/s12985-020-01332-y), 2020-04-25
Supplement: MOESM3 [file 17928658]

>CRESS\_AXH77830

MSKSWCFTINNPTGNDDWELEALKT---ETGEQGTRHYQG---YVVMNGQRTLVRMKTLL-TRAH----  
LEARRGTHQQA  
ADYCKKDGQMSAADKNKCM---WRNMIEWAEKGELDKIKEEYP-SFYLRVY---LEKFRSLSRPTLSILPE--  
LENEWWWG  
ATGTGKSRKLWA---HYAKQLNKWWDGYDGEDVVAIEEWAP-KNECTASLLKIWADRYP--  
FPAEVKGGKLNRRIRPRKLI  
VLSNYSPEQCFGQEED-----LGPIRRRFRVIHFE

>CRESSV2\_FJ959082

RSRNWCFTYNNYDSSPQKCMK-----YEVG-ESGTPHLQG---FVIFKN--AVAKPSQYF-KPAY---HFEKARGTPQQA  
LEYCQKDGKNTVADGGEANKRRYEEAFSAAKEGRMDDIPAD----IYIRHYSTLKKIRFDHAPPAQNNDVL--  
NNYWVYG  
PSGTGKSKSVREF--LYVKNQNKWFDGYEGEDFVLIDDVHP--NWS-GKTLKIWSDHYP--FSPETKGGHIKMIRPEGII  
VTSNYTIEEMYEAED-----RQPIRRRFKVIKEY

>CRESSV2\_JX904107

KSRHFAWTMNNPGPDTEAAVIA----REVG-ESGTPHLQG---MTSFEHARSLSAIIKLL-QKAHPGTHVEICR-DAYKS  
MVYCKKDGDKKPADGGGMERDRWKRAYEMAAEGNLEDIDAD----IKLRFYGTLLKKIKEDHQVTPPTSLPTL--  
DFHWYQG  
SSSGGKSKFAHD---YYLKSPNKWWDQYEPGQTVIIDEWDP--NHKVLASLKKWADHHP--FAAEIKGGTR-  
MLRPPKLI  
ITSNYTIKECFPQEND-----HLPLRRRFTVKQFG

>CRESSV2\_JX904562

KARSFSFTWNNYTEADIARLKG----KEVG-ESGTPHLQG---MINFKSPRSFASVMKEL-EGAH----VEKTI-SSYDS  
MVYCKKDGDVSKAKGDMEKARWKRTRELAAAGKIEEVDDD----IYVRFYGTLLKRIKEDHQVPPAQAEL--  
NFHWFYQ  
ASGTGKSRAAYA---LYIKNSNKWWDGYVDQPCVLIEEWDP--NLAMMASMKKWADHHP--FSGEIKGGTK-  
MLRPPKII  
VCSNYTIQECFPNEQD-----WKPLERRFKVRKFG

>CRESSV2\_KF738877

RSRGWVFTINNYNEWDFVNISKLEK---ERGEEGTPHLQG---FAYFKQRISFNGIRDIL-TRAH----VEIQRGFNAQA  
IDYCKKEGERGAGQKDK-----WKDVLQLARQGKVEIEERYP-AIFLRY---FQKLCGFYRPEHSIILEN-FTNEWWWG  
PTGTGKFKKLND---PYEKSLDPWWDNYQREEIVAIEEFEP-RCKIN-SFLKRWADRYP--FRCEVKGAFLSKLRPLKII  
VISNYQLDECFPNSKD-----LDPLKRRFKEIHFP

>CRESSV2\_KP153377

GNAWCYTLNNYTEEERDSLRSYER-----GAADTPHLQG---YVQFAHQKTL SAVKLL-PRAH----LEERRGTIDQA  
VEYCKKDGMSQKEKGKEENRWKRILEKADEGDEEWLRENEP-NVAFKH---  
MATFRSHKKPRVGTLYEETPHEWWWG  
PTGTGKSRKAHE---HYAKEKNKWWCGYTQGETVIIIEADP--KTMELAALKVWADRYP--  
FPGEIKGGRIEGIRPLRVI  
VISNYTIEECFANQND-----VEPLRRRFKEVKFG

>UJSL001\_MN621482

VSPSGRSVSPSRPYNTKEGETALAPIVAEEPEKTRWQGRIFLITLNQEEKWPRLREYLHTRPVEYMYAAHEVAPT  
NA  
LEYCKKQGMLVEEYGECPIRSANKKGISIKDVMEMDQTQILELRASSFNVRNIRSELLNTQIRNAKHYAP-  
IDFEWYYG  
PTGTGKSRKAFFEGATPIQYANGFFTDWAGSKVLVYEEFRG---QVPYHLILQLTDAYHGYCLNIKGGFR-  
VLDIDKLI  
VTSPLRPEECYPRQCQKRDS--IQQLVRRITKMLHFT

>UJSL003\_MN621469

LHKNWCWTLNNYTEEEVTRLQALAYDEFETGEGTEHLQG---FTMFTRRLRLTQVKDLLGHRIH----  
AEPAHGTPKQA  
ADYCKKDGNTDNTGKNQ-----WDAIRRELAGNLEAIKEQFV-  
GTYHKYRKVIEYECALHTVCHTVDGDLDQNKNKWIWG  
APGLGKSRFVRE---IYTKMSNKWWDGYEGEPAVIVEDLDPTRAEMLTQQLKIWADRYP--  
FTAIEIKGGARKMEPSYRLY  
ITSNYPPEACFKNDVD-----LQAIRRRFQVIHYD  
>AUM61936  
INMKQVFNFMNMIINQTNKVTKAHP--EVTPFYKYIMFGG----  
IEFGKKTNRMHVHGYVYCTKQKSIKELKKHWGTEAH  
FDVALMCDPIYEEGERPKQGNRSDIASAIEECETIGELMDSNP-ELYCKYRNLKDIYARKEALKPKTYEQ-  
PEIIWNYG  
QTGLGKTRMAFED-EECVNYDNSFFSDWHESKVISLEEFNG---KIPYKTLQLTDGYHNYRINIKGGDK-  
LVDLKRIY  
ISSSVHPRDIYRQQDMKENEGGIDQLMRRITKINHF-  
>CRESSV2\_KP153404  
RSRAFIFTWNNPTADTEAALES----RETAPTTGTRHLQG---YIRFTDGKSLRSARRLL-NGAH---VEVAR-TIRQA  
IEYCHKEGDVDDAARGDMEKARWEIAWTKAKTADLEEIDAD----IRVRCYSALTRIQKDYMPPLPLPAP--  
CGLWIHG  
LSGVGKTFVAVYQ---LYSKNASKWWDGYQNQDHILFDDMDP--DVGKAGRFKIWADERP--FIADIKGGSI-SIRPKIFI  
VTSQYTIDECFGEIQT-----RMALSRRFRRIIEKL  
>CRESSV2\_KP153364  
SARNFTFTQNNYGDTELDG-----VQKEVG-ESDLLQLQG---VICFNEKIRESAVRKKL-PGCH----IEIAK-VLPAA  
IEYCKKDGDMPKEKGALEKRKWDEIRVACEEGRFEDLPDD----IRYKNLRLNKMHRCEALRSRELESEA--  
QHLWYWG  
EAGTGKSRKARE---AYLKMCNKWWCGYTEEETVLIEDFDK--KHDVLGHLKIWGDYRYP--FLAELKGDTM-  
KIRPKQII  
VTSNYHPSAIWFDEET-----LLPILRRFKCVEFK  
>CRESSV2\_KC248416  
RNRNYVFTLNNYTPVHEITLNS----REVAPTTNTPHLQG---YICFPNAKTISAVRRIL-AGCH----VEVARGSHAQC  
RTYCIKDGADPREIGNAEADRWEDAWEKAKAGAIEEIPAD----IRIRSYSVLRIGRDYQPNLALLPAT--CGYWIKG  
ESGAGKSHSCFT---LYPKGPSKWWCGYQNEEVVLLDDVDP--SHGLIGLKRWADKYP--FIGESKGGSF-KIRPKKFI  
VTSQYSIEDCFQDVET-----RVALNRRFRVINKL  
>CRESSV2\_JX904420  
QSRNFTFTLNNYTQEHLTTLEILVEQKEVG-ESGTPHLQG---FICFTTTKSMKQCIKAI-PGAH----VEFMKGTEQN  
VAYCSKDNDMTQKKKGAEKERWEEALAAAKEGRFDDIPAD----IQFRYDRNIKRIYAENKPKPQTLNKL--  
TNEWYCG  
PSGTGKSKQARD---AYVKLNNKWWWDGYADEETVIIDDFDK--YDIALSGLKRWSDHYP--FPAEFKGGVK-VIRPKRII  
ITSNYTPPEIWEEEAT-----LGPIRRRFHITQFK  
>CRESSV2\_KT149398  
RTRRIVFTYNNYPPEYNAWLDS----REVAPGTGTPHLQG---YAQYVNPKSITAFRRLF-MGCH----VEPARGTGSQS  
RTYCSKDGSTD-ENPGNREKQRWEDARSLAKEGKFDQIPAD----IYIRYIGNLHRIYREILPPLEPLPAT--CGRWLLG  
RTGSGKSKGVR---VYPKPLNKWWWDGYDDHTHVLLDDVDH--NQSSIGNLKIWSHDYRYP--FIAEKKGGSR-LIRPELII  
VTSQYSIRELFNDNEL-----VLALERRFQVINVN
