# Supplementary material for: Viral metagenomics revealed diverse CRESS-DNA virus genomes in faeces of forest musk deer
Source: Springer Nature journal article supplement (doi:10.1186/s12985-020-01332-y), 2020-04-25
Supplement: MOESM4 [file 17928658]

>Smaco\_AEW47007

YVATISRTSIPHHLLVRLK-LDLHEAYIGRETG-ARGFEHYQCCIDC-----  
LVRFNTEHQLGWHIEECS-WEAS-NYC  
RKTDNRYRYVGDSEEREYS-IATRN----VARIQFHIDHRNDRAISICVDTIG-  
TGKSTYGYLCARRTAT-----YIA  
MHYDNQPVIWIDLPRS-----LAECLEDIKDGLVASAKYEGCLRFIRGVKVLVTTNH---

>Smaco\_AIY31243

CGTIWKHLTWTMEQL-  
AEWFKQHAKEGVIGLEISPTSGKEHYQFKIHLDRGETLEGWKALIGPMGHIEIAV-DKNF-  
GYE  
EKDGNFIKWPTSP-LEKYK-LKLR----WQ-DVVETFERQDDRRILVVVDKQG-  
NGKSYLSRFMEATVIS-----EY  
CLDNPC--YVFDLPR-----AMWVGIEQIKNGLLYEKRYRPRKMWIEPPKVLVFTND---

>Smaco\_AIY31256

CGTIWKDKYGSKEQL-  
AEWFRHAKKEGVIGEEISPTSGKIHQFRIHLDRGETLKGWQELIKAVGHVEVCQ-EKKF-  
DYE  
KKDGNWIEWPESY-LGKFK-MPLL----WQ-QLLEQWNEQDDRQILFVKDVKG-  
NGKSTFGKIMEARVCS-----DF  
CLEYPA--YIFDIPR-----ALWSGIEQIKNGLLYEKRYKPRKVWIEPPKVIVFTND---

>Smaco\_KM598409

YIGTISAEDWNEDGIIRVFE-NDGHELYIGREIG-KHGFRHYQFCMDC-----  
LEKYTADNRTGWHVERCS-WEMS-GYC  
RKTGDYRYIGDSREERYA---LRAR--LIWSFGASVVKQNDRSITVWVDTEK-  
AGKSTFSYLERRTEN-----FVA  
MHYKGEPLIIVDIPRD-----LCRALETIKDGVITS AKYQGTKMFIKGVKILVFTNH---

>Smaco\_KT862224

MD-----HGTTQRL---AYQ-  
HAKEGVIGEEISPTSGKTHYQCKWHLSTRGESIDGWKLLIGPMGHVDIAV-EKRF-GYE  
EKDGKFKWPESP-IAKHK-LALK----WE-ALLDSIKNQDDRHRITVVVDKQG-  
NGKSTFSKYLEANVVS-----EY  
CMEFPK--YVFDLPR-----AMWSGIEQIKNGLLYEKRYKPRKMWIEPPSILVFTND---

>Smaco\_QBP37051

YMATIPHSGITKRAFFKMIRDYDIHKWTYAVERG-RGGYKHIQCRFRNKS---  
FEEIRKALICGHIEEAS---DNWEYE  
KKDGNYMTSEDNHEILKLRYGKLTKV---  
QEWALVLESTNDREVWVVDKDGNSGKTWLT AHLWERLST-PKELISWVH  
SAYNHEPYIIIDIPRTWKWDD--ALYTAIETIKDGLVYDPRYSAHMRNIRGVKVMCMTNT---

>Smaco\_QBP37113

YMATIPHSGITKRAFFKMIRDYDIHKWTYAVERG-RGGYKHIQCRFRNKS---  
FEEIRRALICGHIEEAS---DNWEYE  
KKDGNMNTSEDNHEILKLRYGKLTKV---  
QEWALVLESTNDREVVVVVDKDGNSGKTWLT AHLWERLST-PKELISWVH  
SAYNHEPYIIIDIPRTWKWDD--ALYTAIETIKDGLVYDPRYSAHMRNIRGVKVMCMTNT---  
EPKLSKLSSEDRWVMYR

>smaco\_YP\_009252318

MERALPDEHGTTQRL---  
AYQPHAKEGVIGEEISPTSGKTHYQCKWHL SRGESIDGWKLLIGPMGHVDIAV-  
EKRFRTGYE  
EKDGKFKVWPESP-IAKHKNLALKT---  
WEVALLD SIKNQDDR HITVVVDKQGGNGKSTFSKYLEANVVSDEYN-DYTSY  
CMEFPKKAYVFDLPRATS IKRRTAMWSGIEQIKNGLLYEKRYKPRKMWIEPPSILVFTND---  
DIPWELLED RWDAYR

>Smaco\_YP\_009022025

YIMTVPR-SVPKKA-LKIMIDVDCKKWIIGKERG-KNGYEHWQIRIETSND-  
FFKWCKHHIPAAHIEEAQQGVDECLYE  
RKEGQFWTSSDRVETLHQR-GTLR-----RQRALLALQSTNDREVMVWYD-  
ANNVGKSWFCGALWERT-----VTWVA  
SCYMDRPYVIIDIPR-----SLYCAIESIKDGLIYDTRYHARMINIRGVKVLVLTNT---  
LPKLDKLR-DRWCIFE

>Smaco\_YP\_009030025

YMMTIPR-TVSKRA-LRIMIEKDCKKWIIGKEKG-KNGYEHWQIRIETSNDN-  
FFQWIQDHIPTAHVEKSDNGVDECRIE  
TKEGQYVYSDRVQNLQR-GAFR-----NQRAIQALEATNDRQVVVWYD-  
ETNVGKSWFTGALWERT-----ITWVA  
SCYIDRPYVIIDVPR-----SLYSAIESIKDGLIYDTRYHSSMMNIRGVKVLVMTNT---  
MPKLDKLR-DRWCICT

>Smaco\_YP\_009054985

YMMTIPR-TVSKRA-LRIMIDVDCKKWIIGKEEG-KNGYKHWQIRIETSNDN-  
FFQWIQDHIPTAHIERTECGVDACRIE  
AKEGQYVYSDRVQNLQR-GEFR-----NQHALQALQQSNDREVVVWYD-  
ETNVGKSWFTGALWERT-----ITWIA  
SCYIERPYIIIDIPR-----SLYSAIESIKDGLIYDTRYHSSMMNIRGVKVLVMTNT---  
MPKLDKLR-DRWCIRT

>Smaco\_YP\_009252314

YSVTISADLWKERDVVRLLD-MDLREYYIGREIG-KGGYHHYQCAIDC-----  
LERFNGQHQLGWHIEDCS-WDKL-RYC  
RKGGDYRYIGDSIEEQSYR---SRT---VGTIDTHLKKQNDRQISICVDTKG-  
SGKTTHGYDRSRTNAT-----YVA  
MNYDNPEPVIWIDLPR-----LATILED MKDGLIYSAKYEGQVRHIKGVKVLVTTNH---  
KPAYKLL-ADRWDVFT

>Smaco\_YP\_009508826

YVATISRTSIPHEHLLVRLKLLDLHEAYIGRETG-ARGFEHYQCCIDCAGD--  
LVRFNTEHQLGWHIEECVSWEASKNYC  
RKTNYRYVGDSEEREYSRIATRPKNIVADRIQFHIDHRNDRAISICVDTIGGTGKSTYGY  
LCARRTAETPTRIMDYIA  
MHYDNQPVIWIDLPRSRLVDK--  
DLAECLEDIKDGGLVASAKYEGCLRFIRGVKVLVTTNHVVDKTTYKMLSADRWDIFT  
>UJSL002\_MN621468  
LTIWKDRYKGTKEELKAWLIAHHAKEGVIGEEISPTSGKMHYQCKIHLRGETLEGWKAL  
IGPFGHVDIAH-DKNFSGYE  
EKDGNFIRWPESP-IEKFKDIGPLYF--  
WEQVVLAELEKQDDRKMLVLDTTGKGGKTTFSKHLEAKVVSDEYN-DYTG  
CMEFPAKGYIFDIPRASSIKRRCAMWSGIEKIKDGLLYEKRYKPRKKWIEPPKVLIFTNEP--  
DIPYEMLSRDRWVVVD  
>UJSL004\_MN621481  
YCATISRESIKEHQLVRLNLLDLHEAYIGRETG-NRGFQHYQCCIDCAGD--  
LERFNREHNLGWHVETCISWECSKNYC  
RKTGNYRYVGDSEEREFRNRISRRPQNIVGKRICEHLRSQGNRKISICVDTDGGTGKSTNG  
YIHVRNTAETPVRIMDYIA  
MKYNNPVIWIDLPRTRSVDN--  
DLAECLEDIKDGGLIASAKYEGNLKLIRGVKVLVTTNHWIKKETYKLLSQDRWDVFT  
>UJSL007\_MN621470  
YMATIPHSGITKRAFFQMIRDFDIHKWTYAVERG-RGGYKHIQCRFRTNKS---  
FDEIRHALICGHIEEAS---DTWEYE  
KKDGNYMTSEDNHEILKLRYGKPTKV---  
QEVALRLESTNDREVVVVVDKEGNSGKTWLT AHLWERLST-PKELISWVH  
SAYNHEPYIIIDIPRTWKWDD--ALYTAIETIKDGLVYDPRYSAHMRNIRGVKVMCMTNT---  
EPKLSKLSERWVMYR  
>Smaco\_KY086298  
YMLTIPR-KVHKRT-LKIMLEQDVKKYIIAKERG-FGGYEHWQIRLKT SNKN-  
FFIWCKINIPEAHVEEAM---DTWDYE  
RKEGVYWTSDDTNEIRALR-GKPN-----KQRVLKLLKYQGDRNILVWYD-  
PVKAGKSWIVGHLWEQT-----LTWVH  
SAYDNEGLIIIDIPR-----SLYTAIETIKDGLVYDPRYSARMKNIRGVKVLVMTNT---  
YPRVSALE-DRWDIIN  
>Smaco\_KP233189  
YMLTIPRDKVSKRE-LRIMLDKDCCKWIIGKETG-KNGYKHWQIRLETSNEE-  
FFDWCKKHIPTASIRKAE--VPKWDYE  
AKEGQYWTSSDRTDNLIQR-GEFR-----NQRAIQALRATNDREVLVWYD-  
EGNVGKSWFTGALWERT-----VTFVA  
S-----PYVFDIPR-----SLYCAIESIKDGLVYDSRYQGRMVNIRGVKIIVMTNN---  
KPDLDKLY-DRWRMVV
