# Supplementary material for: Viral metagenomics revealed diverse CRESS-DNA virus genomes in faeces of forest musk deer
Source: Springer Nature journal article supplement (doi:10.1186/s12985-020-01332-y), 2020-04-25
Supplement: MOESM5 [file 17928658]

>pCRESS4\_WP\_000186194

VRRVKIIQYENNPTESLNFDENILNALAYFSHVITEGKPKGTHYHVMELTNPASISA-IAKRFGVPAQYVEVIEGAV-L  
DCIAYLTHEDAKQVDNQKA-----REALTKRADARVIEKISQGM TLSQVYEFDNVMAVENKNLFKTARQEYLKNA  
PVPPVVRTN-YYVYGEGGTGKSLSAKVLARSFVVDGAVPFDGYDGGQPIIIWDDWRALHFDRSLVWKLFAINPERISVNVK  
YGSTSLINAVNIVTCVDPYLKFMEELEYTDKRRKKEDSRQAFRRFPFF

>pCRESS4\_WP\_000818357

ARVYSVVQYEFNPTEDLHFNEVIKNAILNKETKYVEGDVRRPPHWHVLLKFKNQIEFST-IAKLFNVPENLVEKKTGAF-F  
DYLYMTHEDDKQVDIRED-----RRAK-KLSKVEVFLDKLTSGMTMKQVFERDSVFAENATLFRARRSYLKYA  
PTPLVRTN-YHISGAGGTGKTLIAKSMARAFVVDGGRVAFDEYDGGQPIIIWDDFRAKAFERGMTWKIFAIHPDKVSVHVK  
NGETTLINTVNIITSVEPFTEFVNGLAFKDN-KSEVDVQAYRRFPF

>pCRESS4\_WP\_044572803

GRCFEIVQDEKHPTAIL-LTRRIEKVLAKRPNQYTDGEYKVPFHIAEKRKNEASVGQ-VARAYDVAPQYVVRVKP-AF-L  
DLVDYQTHGLERQRVAKRI-----NSPRKQTPIDKLAMRIQEDGLTLRLAKEEDPLSFNRAPGRMEKSRATYLRHL  
PPPSSRIN-FYFEGEGGVGKDLLAKALARTFSVGGENVGLDGYDGGQPVIIIFEEARAGSMGRKELFAFMNPFPEKQSLNVK  
YGATQPVNTITIFTGPDYDFTLDGLEFIDKSKAENKPQARRRIPII

>pCRESS5\_WP\_024393234

FFGQRNYDFEHSDSKDDWKEKIKKELFEIDIKESN--ELKALHCHFVIRFNNPRSYSN-ILELTKCEERNFERSTNE--G  
AILRYLTHHTPEAIGKKEK----VDFVNDLAYRLSVGEFKPINAIAEFGQSIYRKEKKKFQED----YADFLETKKDL  
LLNGKELSTIYIDGFSEVGKSTFAQDLANAYLAAKKDWISKYKDEYITIFNDVDPYDFNFTYFLGTFE-TKILVDVGSR  
YKDKTWFSEYAITKSTDIHEFVNKIELREDNHFNIRYQVQRRFLI

>pCRESS5\_WP\_050238550

FFGQRNYEYEHTESEWKQRILEELFSISIKEHN--ELKGLHCHFVIRFDNPRSYDS-ILELTSQERNFQRSTNQ--G  
AILRYLTHHTPEALGRKEK----VTDFVADLAYRLSIGEFKPHTAIAEFGQSIFRKEKKKFQED----YNDFLDSKRD  
LLNGKELSTIYIEGPSEVGKSVFAQDLANSYLASKHNDWISKYKDEFVTIFNDLDANLFSFTDFLGTFE-QKILVDVSSR  
YKDKTWFSEYAITKSSDIDEFVNKLEIREDNHQNIRYQVQRRINLI

>pCRESS5\_WP\_061866456

FSISRNKQYEHQESD TDWKEKVKSETFYLATELSDGERKGLHCHMILEFRNPVTITSFKEAGKFQSRNVEASKSS--S  
GSYRYLTHHTDKAIRPEK-----DEALQEAFFKVRTGEIFDEEVRERFTTELVIKKNKFIDNS----RQMYQKEVFEDM  
QNNGRNLKTFIFISGSSGLGKSRFAKDLARRYTAPTAKDFISEYKAQDV TIFDDVDAKSFGFQEFNLIFD-KDNITKISSR  
YTNKAWVSHYAITKASKIRNWIERVEYEK----KEVQVSRRFDLW

>pCRESS6\_WP\_017371219

KTFFGMQYLEKEYWETRNQKEIFALVCEKFRQINENGLKLEAPHLHWAIHLKERTTLNK-IAKAFQVEPQYIETGNQGAMI  
GRLAYLTHQTEKMKFKKLLA-TRAKYELNHLLQQVQVQGLFIEDILSDEKYFVYANNLAKFKEAFEAYAQRNSLLTIQDR  
VAQKFEFTSIYIYGKSGSGKSEIAYDILKQYFGGS-KNAVDDYKGEELLLFDDVRRPETFSPADWTKILD-YKNKSALSGR  
FHNRP LSNRLV LMTNTQSPFEFFK--ENEPIE-----QYLRLRTYV

>pCRESS6\_WP\_039670385

TTFIFEQQLKGEYWKAKNKQEIFQEIYNRVKKTFN--NLVFPHLHG YIEFSNKRDL SV-LALNLGLYPQYIEPSGRGGKI  
NSKAYLIHAKSLDSFTKQSA-KEQDES LDMIFQEIIGKLTEDDIFADEKTF LWAYNQKQFDEAFKAYGKISAKTTLRQL  
ENGEFKPTILYIHGQSGIGKTS LAYDLVAEYNAGS-KNIFDEYFGEEIIVLDDPRYD SLLPSDWLKLDD-PLNKSYLSAR  
YRNKLVIGRVIVITNYMSLSEFFRQIPKEDIN-----QYLRRFNNV

>pCRESS6\_WP\_061343647

KSFYGTQQLQEFWDNRNQRRIFEIATRFLRKDDTGNFIKPHVHWLLELKNKRDLDE-IAYKFFVHPQQIEKSGKGCFL  
GRIGYLTHQAESAYFKKRLA-FQQKMDVDYLLQQVQVQGLFLDDIFLDLNYNVYANNKQKREAFDAYSELNSFR TNRDK  
RLGIFDFTTIFYGRSGLGKTTIAMAILDRYSGSA-KNAVDDYKAEELILFDDLKQDSFLIADWLKILD-SRNESTISGR  
FHNKPLSARLIILTTIESPFKYDFGKDEPKE-----QFIRRLSYI

>pCRESS7\_CDE19587

---EVTQPEYLKSP LQDILRKYRTIKQWAYILHDKDKDASSHYHIYINFQQTVD SKD-VAGWFGIPEQFVNKVEGRK-T  
DMLMYLTHSND SYDFSEVVAN-----FDKSEIEQAKIIGDFEKYSYIHS LAVSEQPKCFDR---LQKLWKLQCQWLS  
LNSDRNLKVIVTGKSGTGKTYFARKYMRAYVSSSSNDPLDMYMGQKGIIFDDL RDEAFEFADILKLDD-NNTSTAMKSR

FTNKVLNCKVMIITSFIPIKYWYKSVRYSCDG-----IEQLYRRINMY

>pCRESS7\_WP\_002578150

-RVICFQIQIEYTSSESSFKNIVNNLYKRG--TYTEGNLKKTHIHGMLRLNNSYKFST-IANWFDVTAQRIRKIETSY-A  
AACAYLIHRNNQLTNENHMK-----KLKKRILEEVEAGTLRGYNFHENYAFSDRVALRSYLNNIAIEIHKTLNS-----  
-NKERDLEVIYIHGSSGAGKT--TYAKMTAATSGEDRDPVETYDSSHPCMILDELRPSSMKLTSFLKLVDNNTESMAGARY  
HGKAFIECKLIITSILPIEEFFKNLQANDNE---TAIQIKRRCKTM

>pCRESS7\_WP\_028509833

TCEITQDCCGWTPENVHKFIDGWSSVKDYAYKKDD-TTPREPHIHLMLRFSCAVHTSN-ILARAKITENRIQKMKSWSS--  
AALNYLTHRDEHKWKHVYHQ-----AKQLRADKGREKEIVEAIASGEIRLFNLSEHITSYEENLYAIKTAFNRRTRDLK  
LKNERNMEVIFISGESGVGKDTFAREWCKYFTTGNNDSPFDDYMGQDVIIWSDARDDVYKPAQIHTMLD-NHWSSTQKAR  
FVDQVLNCQYFIITSVKPLNEWYKNFYKESKE---DIKQLYRRIKTW

>pCRESS8\_YP\_006939186

FMYTQQLKYLNSIEQLKNNLENDAYIQDFAMILDENNQVAEHLHVFIKLNQKKTIDY-VADLVDDKAQYIENKSRNE-Q  
NGYLYLLHKTKSAEHKHYENNSKRKTWVQSILNDYADRIIDEKELKDSLNLLELAKNKKLINDIKQVLIIEFDFTYLEQ-  
-ERYKNKQVWVWIFGKSSTGKSMMSQLLAKDYVTSSNRDPFEDYQNKQVLIIEEFRNENIGTNELLQLLDKTNQVRVGSR  
YSNKKIMADLIINTIYEPKYFMFDEPIYQLLRRIDKLVKLDNQKIE

>pCRESS8\_WP\_062359070

---YRTFGYTQQLSHLNR-LEDFPRLMEERTADGV---LKASHVHVMMKFENPRSLQA-VSKIFHDSPQYVEKTRNGY-N  
NMLAYLTHRTKGATAKVEQR---DSKTLDELLERLMDYSITYEEAVGELTASEFSRYHQRLKVTAEYGRQQYAKRWIKEH  
EDNHKPIEVIWITGPAGSGKTVEAKKIAREYVAVGVRDPFQLYTDENVIIDDLRAKTFDYNTLLQLLDPFNST-MADAR  
YSNKTLIADTIITSVYSPLDFYHMLVPEIYD-VDTYKQLERRIS--

>pCRESS8\_WP\_016356676

---YRNFMYENQLKYMKEDINMLAKYVEETINESE---LVAPHYHIALKFENPRNVNS-VAKKFNDLPQNFEIWLNRP-N  
NLYSYLIHKTSDATKSIHRG---RNEEIRHLIDSGNGEITLKLMEELSPTEYARNENQINIHKLLANKRFEAFKKRM  
DSEEKRIEVYFLFGGTGTGKTRFAKTRY-KYITGSNRDLFANYDGETVVILDELRPNSISYNELLKITDPFNFENVVGSR  
YLDKKLVAETIVITTPFSPEEFYQTLKGEQTN-IDKKEQLFRRINV-

>UJSL005\_MN604398

LYNTSQATVEEWFANKPKIQSMAACLVDGGKFLKDSFGPECHMEVAKRYLQAYIYVLEHAANKKVFIEYRTPKAGRSTT  
KKVQSDVFIRELSRNMVVRP-----IPRMVWVINGHTGTGKSLANKFMDLHQPSSAYMCSPSGSPDNDPRSVLLDD  
FNIALTPLTTLFNMTDQYNTIDCKGSYMIYSPYVVGMEQTYTTPHRKITDHSRRINLYIKTASPVNNVDGYRVMHPD  
GTPDELIPKMNLDEMIAYIDSYKSWEQKYEEQLNNEENYHEVENN
