# Supplementary material for: Viral metagenomics revealed diverse CRESS-DNA virus genomes in faeces of forest musk deer
Source: Springer Nature journal article supplement (doi:10.1186/s12985-020-01332-y), 2020-04-25
Supplement: MOESM6 [file 17928658]

>UJSL006\_MN621480

KGDAVKTWFCWPKCTIPKEFALKLLEKHGL--KEKHEDGSPHLHAYLKLKIKRKKFNEK--MFDLIDVDK-  
KVFHGNQK

VKDVLAVEKYVTKG-----QHKSLLKEDYLDKPLELLEEGKINFFQINNFLKNQDCYKMLLNKQNRPLKPLEK  
-----RRHHWIFGESNTGKTERLWKAMDTEGGWFQIPTNNDWKGYNGEINLYMDEYKGQLTIQELNRICDG--  
GAKV

NKGGSTQLSWEVTWICSNYSIDNCYNKAEKMLLMSLWNRFNNEEML-

>pCRESS9\_KXT29014

YRLKTKMVGLTYSRFPVKEKFIQLLKELFNSKCNDYHMDSGLHHALLVFDKKIQLRDAQKVFALPN-----  
YQTAK

FGHLDRFRAYIIKKGNFIENLKSGLIVAQKLSFGYKLDNVLYWDKLRDKMSKTFVFELIYDFDSLFEFNMVEKM  
VLKL

MNS--

GVRKKSFLVGGTGIGKTRMIKTILKYSYIKGKIDFSPKKFDDSRPVVIMDDITLQYLPEDGFKNFIGNGDTTEV  
DVKMQKTATITGGKLFYIVNKHP--EKWVK--NDEYDHIYIRKNIEVI

>pCRESS9\_KXT29032

YRMHSRNIGFTYPNLSLSKEEVQKIFIQKESRSRELHEDGEPHIHILIQLNKKTEFCNAREFFALPTFNKPEHWYRIG  
A

YGDVLDDGIFKLLISAFEAEKALNQYLQELDVVIYYKQFPIRDRVIQENFYPKSPVVKREHSLQTFRLYHEKVQLIHK  
EQ

FNS---

KSPLTIVLEGLTQIGKTDLAELIQPYNKYKIDFNFSRENYNDSYKICIYDDMGMEEVSKKLMHALIAGRGSFQT  
REPYGKKRTISGNKLNIFIVNRNKSFKGWIEKNKEWKRFEYVEPNVIII

>pCRESS9\_CBX25033

FRLRTKDFMTYSQCDLGEKIFNHLKQLMA-SENHADNNGVHSHVFLQLKKYLDIQSG-RFFDIDG-----KHPEIER  
ARTVQGSVDYVKKDGDFFIHKSLNDFILKTDYFYEKIDLIKILNERFTKKKELEDEDYSFNSFKSNSKTNEIIQT  
QL

SVS-LGKRPKSIVIEGPSRLGKTEFILSYTHYNYTRGEFNFQSHKNAYKINIFDDISLTKIKEGLIKDIIGGQKGFTV  
DVKYAPKRNISGKLSIFLVNPDIFENYCEWSRNNGHKIFYIEDNCIF-

>pCRESS9\_WP\_011412958

FQKNAKDIFLTYSKCPLGKDKIHNYIKEIMI-SENHQDHKEIHTHVLFQLTKRFNIQSD-RFFDIEG-----FHPRIET  
ARNIEKSISYIKKDGDFIVKSLNDFIKILDRDFYIEKIDFVEQVLNKKFTKKKELEDEDYSFDSFKSNSKTNEIINQQ  
L

SVS-LGKRPKSIVIEGPSRLGKTEFILSYTHYNYTRGEFDFSKQNHKNAYKINIFDDISLTKIKEGLIKDIIGGQKGFSY  
NVKYAPKRTIAGKLSIFLVNPDIFENYCEWSRNKGYKYLEDNCIF-

>pCRESS9\_WP\_012662291

-MFQAQNIFLTYSQCDLSKEEIKNFIINLCN-EENHQDHKGKHHHVFFQLNKRFKTRDL-NIFNIPKNI----YSPHIEP  
IKDTTDVRNYVKKDGDFFIHKSLNDFIKILDRDFYIEKIDFVEQVLNKKFTKKKELEDEDYSFDSFKSNSKTNEIINQQ  
EQSVISQRFKTLIVEGNSKSGKTQFFKSVTPFNYIKDDVDFSDENYDEDKYVNIYDDIDIYDIARNLTKVVIGNQKDS  
IV

NMKYKPRN-----

>pCRESS9\_WP\_013747472

FRLQTKDIFLTYSKCPLGKDKIHNYIKELMI-SENHQDHKEIHTHVLFQLTKQLSIRNQ-RFFDIEG-----FHPKIEN  
ARDIEKSIDYIKKDGDFIVRKSLLDFILNDRDFYLEQSELIDRILNKKFTKKKELEDEDYSFDSFKSNSKTNEIINQQ  
SVS-LGERPKSIVIEGFSRLGKTEFILSYTHYNYTRGDFDFSKQSHKNAYKVNIFDDISIPQIKEGLFKQIIGGQKGFKY  
NVKYAPKRTIAGKLSIFLVNPDIFENYCEWSEDNGHKIFYIEDNCIF-

>pCRESS9\_WP\_042068233

-IFKAQNIFLTYSQCDLSKEEIKTFIINICD-EENHQDHKGKHHHVFFQLNKRQLQTRDL-TIFNIPKNN----YSPHIEP  
IKDTTDVRNYVKKDGDFFIHKSLNDFIKILDRDFYIEKIDFVEQVLNKKFTKKKELEDEDYSFDSFKSNSKTNEIINQQ  
AKRKFKNMVFIFESIFDFCTFKKIPILTSTYETQK

EQSSISKRFKTLIVEGNSKSGKTQFFKSVTPFNYIKDDVDFSDENYDEDKYVNIYDDIDIYDIARNLTKVVIGNQKDS  
IV

NMKYKPRTKIKGSDISIMLVNEDTSIEKYCFDNFKRGRKEYIRENAIF-

>pCRESS9\_YP\_001965305

FRLRTRDIFLTYSKCPLGKEKIHNLKQLLA-SENHQDHKEIHTHVFIQLKKQIEITNQ-RFFDIEG-----YHPKIET  
ARDVEKSVSYIKKDKDFIIRKEIDDFILKIDRDFYEQIELIDRILNRRFIRKKEADTHYQFNSFKTNSETNEIINSQL  
---LSHRPKSIVIEGESRMGKTQFILSYTQYNYIKGEFDFSKKTYKDYYKIDVYDDFGVPEISQGLQKNIIGGQECFTC  
NVKYAPKRQLSGNKLSIFLVNPDNSFKGYCEWSRNNGHKFYIEENCIF-

>pCRESS9\_YP\_001965310

FRLQTKDIFLTYSKCPLGKEKIHNLKQLME-SENHQDHKEIHTHVLFQLNKRCNLTSQ-RFFDLDG-----YHPKIEN  
TRDVEKAIEYIKKDGDFVVKKTLDDFIINLDRDFYLEQIEFIKRVLKEAFKKEELADDDYSFESFKTNSTTNEIISQ  
L

SVS-LSKRPKSIVIEGSPSRIGKTEFLLSYTHYNYIRGEFDFSKESHKNAYKINIFDDISIPQIKEGLFKNIIGGQRGFRF  
NVKYAPKRFIAGKKINIFLNPDISFKGYCEWSYKKGHKFYIEDNCIF-

>pCRESS9\_YP\_006959585

-MFQAQNIFLTYSQCDLSKEEIKTFIINLCN-EENHQDHKGKHHHVFFQLNKQFRTRDL-TIFNIPKNI----YSPHIEP  
IKDTTDVRNYVKKDGDFIIFKLLKLYAESLEPNYAFKN-----AKRFLNMVFIFESIFDFCTFKKIPILISYETQK  
EQSSISKRFKTLIVEGNSKSGKTQFFKSVTPFNYIKDDVDFSDENYDEDKCVNIYDDIDIYDIARNLTKVVIGNQKDS  
IV

NMKYKPRTKIKGTDISIMLVNEDTSIEKYCFDNFKRGRKEYIRENAIF-

>pCRESS9\_YP\_007008175

FKLNTKDIFLTYSKCPLGKDKIHNLKQLII-SENHQDHKEIHTHVLFQLTKRTTFHGE-RFFDIEG-----FHPKIET  
ARDIEKSIDYIKKDGDFIVKKTLDFFIKNLDRDFYEQIDLIEKILKKKFIKQAEIDKGYDLNTFKVDKSTQEIGTNQ  
L

KV----KRPLSIVIEGSPSRLGKTEFIISYNHFNYIRGSFDFSKENYNDSFKVDVYDDISMNYISSGLLKNIIGGQRGFIV  
DVKYPPKRLLSGNKLSIFLVNPDISFESYCEEDEKHAGETYIKSNCIF-
