# Supplementary material for: Viral metagenomics revealed diverse CRESS-DNA virus genomes in faeces of forest musk deer
Source: Springer Nature journal article supplement (doi:10.1186/s12985-020-01332-y), 2020-04-25
Supplement: MOESM7 [file 17928658]

>CRESSV1\_KF133822

--LRNVCFTLYNADPEDVASK-----LSELEEKCPESDRHLQGYLECTKPVRFGTLKDFLGS--TVHLERRRGNRQQAR  
DYCRKEET-KQGQRTD-LDAIREMVVAGATEESIADEYFGTWARNHRAIARYKFLKSKPRD-----FKPRVIIRWGVAGS  
GKTRGVYDTHEPR-PNGGTWVFDGYDPHEVLLDDFYG-WLPWSMLLQMLDRYPMSVPKKGSTCNFR-  
AKFIYITSNADP

ETWYD-YSKPGIEFEALKRRVDETHHF

>CRESSV1\_KF246569

-QVKMWALTVKNWDLFDLEE--

IGNYQDGQKHTGEKTGYQHCHLNLELEKRQYMTWIKRVLFNIPDMHCEKRQGTREQCD

TYLAKDGEFERGHRSD-

LDEIHDMIKEGKDLFDVYESHFASTVRYSSGLEKYIVLHDSKRARNSETTAPQVIVYVGPAGS

GKSWHCFNDEDYPIQMYEKVYFDGYNREKTIWFDEFNGRSMFPGKFCQLADRFPGIYETKGGSVLISGLKKILISTI  
SYP

ATWWG-SNRFNLDPDQLYRRLTKCYL

>CRESSV1\_KJ206566

-MVKYRKVFVTSFNNTSAMEQ-----DLVDCMEHAPTTGRIHYHLYIEFYKTMNTIKKILKD-ATANIQPARGTPQEAV  
DYIKKD GATNQGHRSD-

LDDVFQRLQVGDNILDIIEGHPGTCIRYIKGILAVKGLVDQRRQRQEARQMPTVLVYIGKSGA

GKSHACSQDPDYPVQGPSKVYFDGYTGESTIWFDEFGGSVLPFHVFLRLADKYETRVETKGGSVLISGLKILISTT  
TPP

KLWWE-SRKFNEDPYQLWRRRLTRVYYI

>CRESSV1\_KM573766

MPARYSNWILTTWDPYLKEN--WWEMDNHEHCHEEQR--EHWHIYFELNHRKNMASIK-

EWLNDLTVHCEVRRGTGQQAI

KYCQKGFDFQ-GSRSD-

LVNCKQLLEEGVSMIELAQAHFGDFVRYRGLYQYADLLSREKQRTAGLSEVEVTVFIGPAGS

GKTYNCSKKA EYMQQNGKCYFDGYEKQKCIWFDEFSTMQFNHWCRLADKYGVRVETKGGSVQISGLKRIII  
STIIPP

GEWWN-SQFRDDPEQLWRRRITEIYYC

>CRESSV1\_KM874309

LMRRNVVGTLTNERPHEITS-----YEICPSSKRRHLQFYCEVFGQQRLGAVRQLFGP--TVHVEPRRGTVDPEAR

TYCSKEDTPKSGKRS-DADIKEELDAGSSLKSSISQQHFGQFLRYRKSFEAYIVLNQDPRT-----WEMENSILWGEPGT

GKTKLAYDLKEMR-NQNGNVWFDGYHGQEILLIDYDG-WIPLAFLQLLDYRPMNVQTKGGSVQISGLKRIII

SKKIIITSNKSP

ECWYN-WSKFGKNFGAFERRINQVFHY

>CRESSV1\_KP153497

-MSRGKSWCFTIHSRGECD--CDWLHPIG-MERCPETGKLHLQALQLDKQQRSLFMKKLHKT---

AHWEVMKGNWTQSI

EYCSKSEK--MGQRTD-LETIGKMKVKNKTNLELVDTLGAGVSKFQKHIS--FTYSEKDSRQA--

TGVKIVLYGPTGT

GKTYAAVNS---NSQKATKLWFDGYENQKVLVIDDFDG-SVEFRYLLRMIDVYKFPKPAEVKGG-

MVWGVWDTVIITSNVHP

ASWYT-----DTSPLKRRIAEIRLC

>CRESSV1\_KT149404

-MS-SRRWVYTLFAAAEDD--YSNLDDFERLECCPTTSKVHLQGYVEFEKQPRMAALKKLNST---

VHLETAKGTREHCV

RYCTKDETT-QGRRNDLLETTLAIVNGELSRDDVFDTRPDLICKYARGINELLTYRAK-KERQG--

DELHTEVLWGDAGV

GKTRYAYG-----RCKGGALWWDGYDGQSILVIDDFYG-WVEHSVLLRILDRYPFKIDIKGS-

STYANWKEVYITSNRHP  
STWYTRAPWT--EDKALQRRLGAIYEC  
>CRESSV1\_KT862256  
-QAKVWTMTVKNWDLFDEER--  
IQNQTEGSKHTGQQTGYQHCHFNELEKKTMAWIKRELFNREDIHCEPRRGSREQCD  
SYLNKDGEFKPGRRTD-  
LDDIHDMIKEGASLYDCYEEHFGTVVRCERGLRDYIALRDTILATKKKYPAPEVIVYVGPSPGS  
GKSWHCSEDPDYSIQMDSKIYFDGYNNQKTLWFDEFSGKTMPTKFCQIADRYPGRYETKGGSVLIYGLKKILISTV  
EYP  
ALWWG-SDRYNKDPEQLFRITKCYLL  
>CRESSV1\_KU043411  
TMNRMRCATVTSFNIDYIKR-----DVINNLEVCPELGKLYQMYMEFEKVTVKQIKRLLRD-  
NGAHVEPRYGTAKAI  
EYCKKDGNQ-QGERTD-  
LADVYESLKVGRSLLDIEEHPGTYIRYFRGIERVQDLFRRKQKLEERVQPTVLVYIGKSGT  
GKSHHCYHDPDYPVQQAGKVYFDGYDGESTIWFDEFSGSVLPFGVFLRLCDKWETRVETKGGASVCITNLRKILIST  
TTYP  
KNWWD-SRKYQEDPKQLWRRLTHVYYI  
>CRESSV1\_KU043424  
RPKRFRFACITAWNMDAFDP-----  
QRMHDRETCPRTRHHLQCYFEAPNPKTVEQWQDVVCDKPRAHVECRHNEGDRAA  
DYCKKDGDG-QGARMD-  
LADCKTMIDEGKQ MIDLYEKHFGT CVRCHRGLMLYKDLVDRKRRKEAEPEPKEVVVYV GASGS  
GKSHHCWHD PDYPLLAENK VWF DGYEGEEVLWIDEFGRSVFPFGLFLQVTDKW GARVEVKGGSVETF-  
FKKILISTTVP  
GEWYK-CPNFLSNPQQLWRRLTKVYWL  
>CRESSV1\_KX388513  
RHKQLAEWT-TYG-----DPTTMNLEYTQNQDNFHWQGYVQFHKSLRFTQVKKYLSY-TAHVEQANGTLEENI  
QYCSKSASE-SGERTD-IERLYVDVKS GKS MACI DHHTNTWFKYHGAVDKYLEQKVACQKRTC--  
TVTVWVDQGGTGKT  
TRALYDINE---RTHEEGRLWWDGYDGQPTLVIDDCVH-LIKFDYWKSLVDGHPMRIQIKNG-  
WKNALWNRVIINSNRHP  
NNWWPDNSEANLSMPYFKGRIALINHV  
>CRESSV1\_KX388515  
RPQQLRHWTFTIGGEEAQTITDWDATTMNLEYTQNE DNFWQGYVQFHKSLRFTQVKKYLS--  
TAHVEQAKGTLEENI  
QYCSKSASE-SGERTD-IERLYVDVKS GKP MASIIDHHTNTWFKYHGAVDKYLEQKTACQKRNC--  
KTVWVDQGGTGKT  
TRALYDIDE---RTHEEGRLWWDGYDGQPTLVIDDCVH-LIKFDYWKSLVDGHPMRIQIKNG-  
WKNALWNRVIINSNRHP  
NNWWPDNTEANLNMPYFKGRIALINHV  
>UJSL017\_MN621476  
PTPRFRAVCFTSFVPEAMWDR-NWEQLLGHKEICPETGRLHIQGYVEFSGQKKMKQIKLIFGD-  
PAIHLEPRRGTEAEI  
IYCKKEGQQ-QGQRTD-  
LEDTYERIKVGQSLLDIAEAHPGTYIRYFKGIERLRDLMQORAQKLEARVPPEVIVYIGKSGV  
GKSHACYNDPDYPVQQTGKVYFDGYQGERVIWFDEFSGSVLPFHVFLRLADKWETRVETKGGSSICILGLKKILIST  
TTYP  
KDWWPNSEKFREDPNQLWRRLTRVYYI
